# Supplementary material
Source: PubMed Central journal article supplement (PMC6824966)
Supplement: NIHMS1053979-supplement-Supplementary_Information.pdf [file NIHMS1053979-supplement-Supplementary_Information.pdf]

**Supplementary Table S1.** Landmarks used in morphometric body shape analysis.

| Landmarks |                                                                   |
|-----------|-------------------------------------------------------------------|
| 1         | Tip of snout/rostral edge of premaxilla                           |
| 2         | Posterior tip of supraoccipital crest                             |
| 3         | Dorsal insertion of the caudal fin                                |
| 4         | Ventral insertion of the caudal fin                               |
| 5         | Point of maximum curvature on the most ventral branchiostegal ray |

  

| Semi-landmarks |                                                                |
|----------------|----------------------------------------------------------------|
|                | ventral outline of the head connecting Landmark #1 and #5, n=8 |
|                | dorsal outline of the head connecting Landmark #1 and #2, n=8  |
|                | dorsal edge of the body connecting Landmark #2 and #3, n=18    |

**Supplementary Table S2.** Summary of fish samples used for ELISA.

| SS<br>L | Stage | SL (mm)   | Age ( $\pm$ SD) | n    | average weight (g) per fish |
|---------|-------|-----------|-----------------|------|-----------------------------|
| 4.9     | CR    | 4.9-5.1   | 12 $\pm$ 2.9    | 1318 | 0.000893649                 |
| 6       | aSB   | 5.9-6.2   | 13.5 $\pm$ 2.5  | 654  | 0.001709021                 |
| 6.4     | DR    | 6.4-6.6   | 15 $\pm$ 2.5    | 403  | 0.003138213                 |
| 7.2     | PB    | 7.2-7.5   | 16 $\pm$ 2.7    | 294  | 0.004842177                 |
| 8.6     | PR    | 8.5-8.7   | 20 $\pm$ 1.3    | 149  | 0.008157047                 |
| 9.8     | SP    | 9.5-9.6   | 26.5 $\pm$ 2.1  | 98   | 0.013067347                 |
| 11      | J     | 10.9-11.7 | 32 $\pm$ 0.5    | 58   | 0.022691379                 |
